# Supplementary material for: Opposite trends in the consumption of manufactured and roll-your-own cigarettes in Spain (1991–2020)
Source: HighWire-hosted journal article supplement (doi:10.1136/bmjopen-2014-006552), 2014-12-01
Supplement: bmjopen-2014-006552supp_figure.pdf [file bmjopen-2014-006552supp_figure.pdf]

**Figure S1** Differences between observed and model predicted units of cigarettes per capita: (a) Factory Made; (b) Combined.

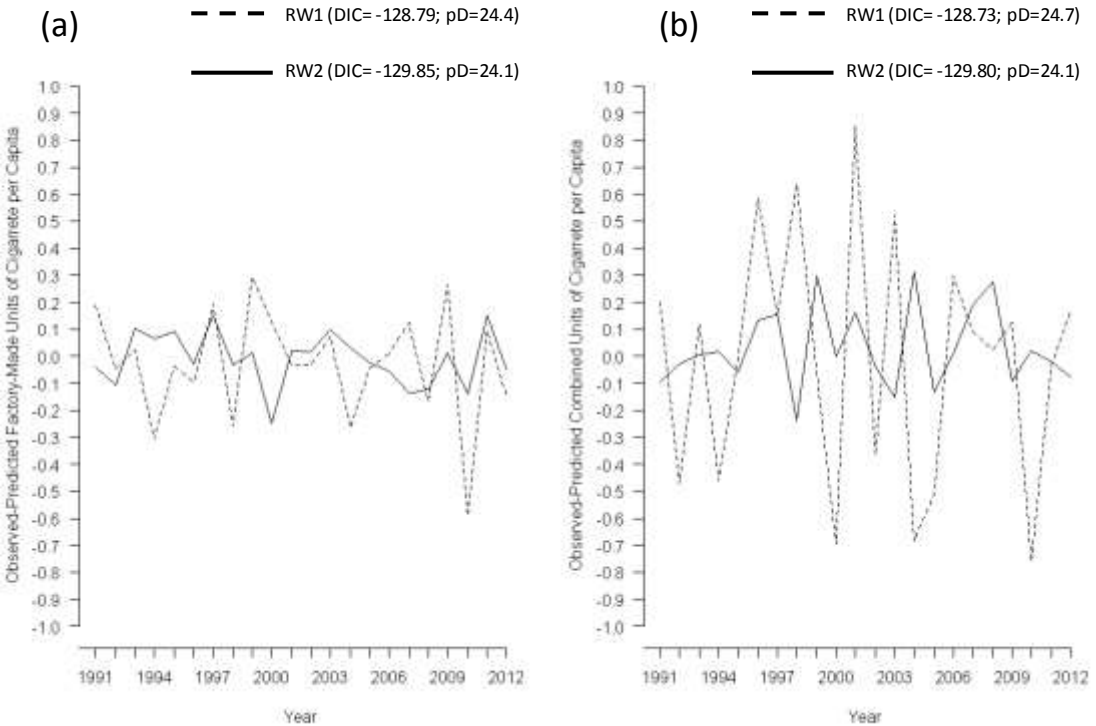

**RW1:** Random Walk 1 prior assumption; **RW2:** Random Walk 2 prior assumption;  
**DIC:** Deviance Information Criterion; **pD:** effective number of parameters estimated through the model.
